# Supplementary material
Source: publisher figshare collection journal article supplement (https://geolsoc.figshare.com/ndownloader/files/34180057)
Supplement: Supplementary file 1 [file 34180057]

#NEXUS
BEGIN TREES;

	UTREE 1 = (Amphimedon_queenslandica: 7.554884, (Trichoplax_adhaerens: 7.037558, (Acropora_digitifera: 6.393530, ((Ciona_intestinalis: 5.592590, (Danio_rerio: 4.354511, (Mus_musculus: 0.798092, Homo_sapiens: 0.798092) [&95%={0.620676, 1.2882}]: 3.556419) [&95%={4.21306, 4.53298}]: 1.238079) [&95%={5.20128, 6.02971}]: 0.646247, ((Brachionus_sp: 5.911847, ((Crassostrea_gigas: 5.387488, (Lottia_gigantea: 4.936409, Aplysia_californica: 4.936409) [&95%={4.7144, 5.21999}]: 0.451079) [&95%={5.3226, 5.48416}]: 0.301840, (Alvinella_pompejana: 5.056555, (Helobdella_robusta: 4.385381, Capitella_telata: 4.385381) [&95%={3.2819, 5.10412}]: 0.671174) [&95%={4.77987, 5.4905}]: 0.632772) [&95%={5.49977, 5.89708}]: 0.222519) [&95%={5.70514, 6.09881}]: 0.196765, ((Armorloricus_elegans: 5.659169, ((Meiopriapulus_sp: 3.806207, (Priapulus_caudatus: 0.681128, Halicryptus_spinulosus: 0.681128) [&95%={0.216796, 1.66237}]: 3.125079) [&95%={3.10183, 4.97369}]: 1.568182, (Pycnophyes_kielensis: 3.930751, (Echinoderes_sp: 1.275967, Echinoderes_horni: 1.275967) [&95%={0.363125, 2.90752}]: 2.654784) [&95%={2.45136, 4.95558}]: 1.443638) [&95%={5.18358, 5.66227}]: 0.284779) [&95%={5.38505, 5.92346}]: 0.323182, (((Gordius_sp: 2.581449, Nectonema_munidae: 2.581449) [&95%={1.12769, 4.32443}]: 2.306986, ((Xiphinema_index: 3.221374, (Trichuris_muris: 1.976880, Trichinella_spiralis: 1.976880) [&95%={1.04015, 3.18074}]: 1.244493) [&95%={2.23486, 4.2478}]: 0.787932, ((Pristionchus_pacificus: 1.902566, Caenorhabditis_elegans: 1.902566) [&95%={1.32646, 2.88448}]: 0.943131, (Brugia_malayi: 1.804061, Ascaris_sum: 1.804061) [&95%={0.851112, 3.01348}]: 1.041637) [&95%={2.01547, 3.8626}]: 1.163608) [&95%={3.17541, 4.85467}]: 0.879129) [&95%={4.20944, 5.55474}]: 0.983696, (((Actinarctus_doryphorus: 3.209778, (Echiniscus_testudo: 0.711215, Echiniscus_bisetosus: 0.711215) [&95%={0.236219, 1.64396}]: 2.498563) [&95%={1.82319, 4.3859}]: 1.417103, (Milnesium_tardigradum: 3.451078, (Richtersius_coronifer: 2.358734, (Ramazzottius_varieornatus: 1.748007, Hypsibius_dujardini: 1.748007) [&95%={0.738749, 3.15141}]: 0.610728) [&95%={1.2804, 3.63606}]: 1.092344) [&95%={2.16663, 4.49973}]: 1.175803) [&95%={3.52238, 5.32056}]: 1.152277, ((Epiperipatus_sp: 1.757569, (Peripatus_sp: 0.555977, Euperipatoides_kanagrensis: 0.555977) [&95%={0.187332, 1.18421}]: 1.201592) [&95%={1.43245, 2.68907}]: 3.908730, (((Pycnogonum_sp: 4.523105, Anoplodactylus_eroticus: 4.523105) [&95%={4.30594, 4.93078}]: 0.839384, (Limulus_polyphemus: 5.093842, ((Siro_boyerae: 4.228299, Ixodes_scapularis: 4.228299) [&95%={3.08811, 4.80538}]: 0.594620, (Chaerilus_celebensis: 4.537288, (Acanthoscurria_gomesiana: 3.453135, Neoscona_arabesca: 3.453135) [&95%={3.00661, 4.17055}]: 1.084152) [&95%={4.3589, 4.84087}]: 0.285631) [&95%={4.55647, 5.06548}]: 0.270923) [&95%={5.00799, 5.26957}]: 0.268648) [&95%={5.19909, 5.53176}]: 0.175337, (((Scutigera_coleoptrata: 4.594749, (Strigamia_maritima: 4.025868, Lithobius_fortificatus: 4.025868) [&95%={3.83359, 4.43982}]: 0.568881) [&95%={4.21923, 5.00956}]: 0.471048, ((Prostemmiulus_sp: 3.242468, Polydesmus_angustus: 3.242468) [&95%={1.56605, 4.38865}]: 1.331747, (Polyxenus_lagurus: 4.050128, Glomeridesmus_sp: 4.050128) [&95%={3.01266, 4.73148}]: 0.524087) [&95%={4.26355, 5.00108}]: 0.491582) [&95%={4.74647, 5.34996}]: 0.364671, ((Meganyctiphanes_norvegica: 3.063466, (Petrolisthes_cinctipes: 2.112005, Litopenaeus_vannamaei: 2.112005) [&95%={0.815254, 3.69993}]: 0.951461) [&95%={1.5366, 4.48963}]: 2.168406, ((Xibalbanus_tumulensis: 4.542292, (Tigriopus_japonicus: 2.766925, Eurytemora_affinis: 2.766925) [&95%={1.38533, 3.95409}]: 1.775366) [&95%={3.69213, 5.0087}]: 0.509928, ((Artemia_francisca: 4.268861, (Daphnia_magna: 0.574199, Daphnia_pulex: 0.574199) [&95%={0.175894, 1.54082}]: 3.694662) [&95%={4.05798, 4.64922}]: 0.642096, (Folsomia_candida: 4.688908, (Meinertellus_cundinamarcensis: 4.423756, ((Ephemera_danica: 3.671074, Calopteryx_splendens: 3.671074) [&95%={3.2288, 4.16856}]: 0.494423, ((Tetrix_subulata: 3.499506, (Peruphasma_schultei: 3.065504, (Periplaneta_americana: 2.109465, Mantis_religiosa: 2.109465) [&95%={1.34667, 3.07936}]: 0.956039) [&95%={2.10489, 3.62545}]: 0.434002) [&95%={3.21576, 3.90806}]: 0.449235, (Cercopis_vulnerata: 3.792803, ((Gynaikothrips_ficorum: 2.907766, Nasonia_sp: 2.907766) [&95%={1.67731, 3.52089}]: 0.691223, ((Platycentropus_radiatus: 2.459971, Parides_euridedes: 2.459971) [&95%={2.03678, 3.04701}]: 0.913331, (Tribolium_castaneum: 3.148907, Eurelon_nostras: 3.148907) [&95%={3.07134, 3.34737}]: 0.224394) [&95%={3.18896, 3.62877}]: 0.225688) [&95%={3.36307, 3.87103}]: 0.193814) [&95%={3.53328, 4.06849}]: 0.155938) [&95%={3.68043, 4.23112}]: 0.216757) [&95%={3.88359, 4.46361}]: 0.258258) [&95%={4.12765, 4.71819}]: 0.265152) [&95%={4.40357, 4.94891}]: 0.222049) [&95%={4.65875, 5.13336}]: 0.141262) [&95%={4.83168, 5.25303}]: 0.179652) [&95%={5.14396, 5.39395}]: 0.198596) [&95%={5.29375, 5.58663}]: 0.107358) [&95%={5.40246, 5.69099}]: 0.128473) [&95%={5.51908, 5.82786}]: 0.112859) [&95%={5.62488, 5.94233}]: 0.092972) [&95%={5.71371, 6.03377}]: 0.110220) [&95%={5.82745, 6.13786}]: 0.126261) [&95%={5.9662, 6.24782}]: 0.130225) [&95%={6.10814, 6.36127}]: 0.154694) [&95%={6.29516, 6.52649}]: 0.644028) [&95%={6.5445, 7.85853}]: 0.517325) [&95%={6.71571, 8.35186}];

END;
